# Supplementary material for: Inhibition mechanism of the chloride channel TMEM16A by the pore blocker 1PBC
Source: PubMed Central journal article supplement (PMC9120017; doi:10.1038/s41467-022-30479-1), 2022-05-19
Supplement: 41467_2022_30479_MOESM1_ESM.pdf [file 41467_2022_30479_MOESM1_ESM.pdf]

## **Supplementary Information**

### **Inhibition mechanism of the chloride channel TMEM16A by the pore blocker 1PBC**

Andy K. M. Lam, Sonja Rutz and Raimund Dutzler

## Supplementary Figures

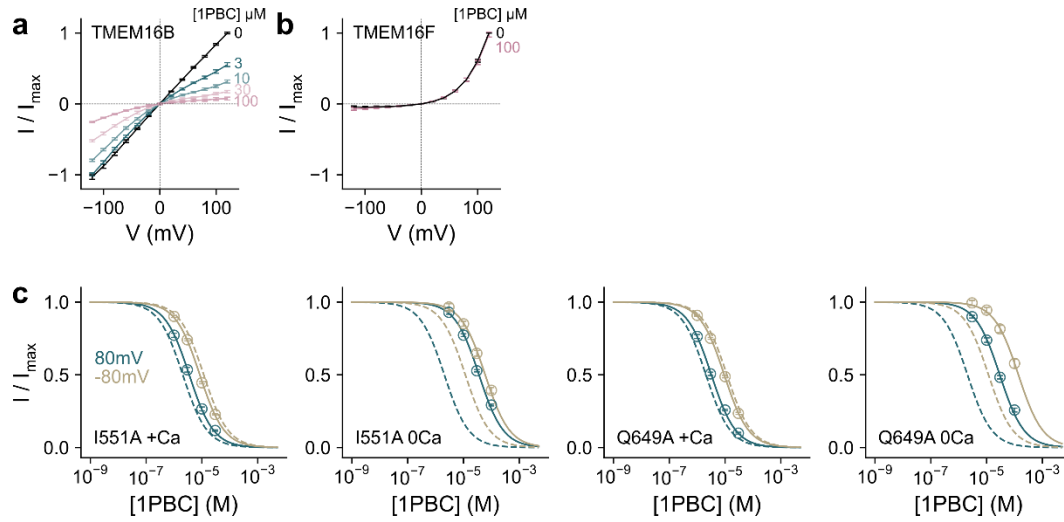

**Supplementary Fig. 1: Effect of 1PBC on TMEM16B, TMEM16F, and selected constitutively active mutants of TMEM16A.** a, b, Steady-state current-voltage relationship of mouse TMEM16B (a) and TMEM16F (b) at the indicated concentrations of 1PBC applied to the intracellular side of the membrane at a saturating  $Ca^{2+}$  concentration (15  $\mu$ M and 300  $\mu$ M respectively). Data are averages of 5 and 6 biological replicates respectively, errors are SEM. c, 1PBC concentration-response relations of the indicated constitutively active mutants of TMEM16A measured either at a saturating  $Ca^{2+}$  concentration (2  $\mu$ M) or at zero  $Ca^{2+}$  at -80 and 80 mV. Data are averages of 6, 9, 7, and 7 biological replicates respectively, errors are SEM. Solid lines are fits to the Hill equation. Dashed lines show the relations of WT.

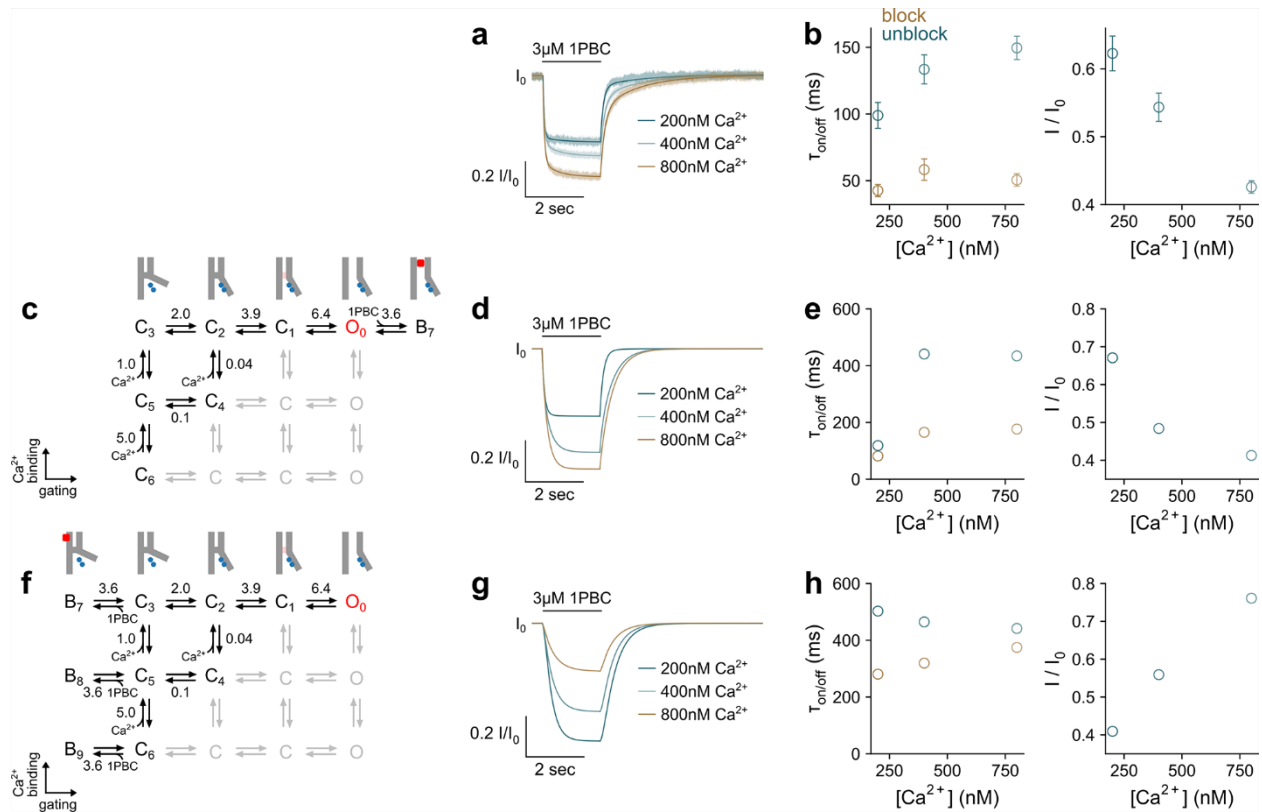

**Supplementary Fig. 2: State dependence of 1PBC block.** **a**, Kinetics of 1PBC block at an intermediate 1PBC concentration and the indicated sub-saturating  $\text{Ca}^{2+}$  concentrations in ultra-fast concentration-jump experiments at +80 mV in the inside-out configuration. 1PBC was applied from the intracellular side. The current traces were corrected for rundown using a linearly decaying baseline, and were normalized to the respective steady-state currents in the absence of 1PBC ( $I/I_0$ ). Solid lines are empirical fits to a sum of two exponentials. **b**, Time constants and fractional blockade by 1PBC. Data were obtained via an empirical exponential fit and are averages of 15 biological replicates, errors are SEM. **c**, Open-state block model. **d**, Time course of 1PBC block calculated using the open-state block model shown in **(c)** at the indicated  $\text{Ca}^{2+}$  concentrations. **e**, Time constants of blocking and unblocking and fractional inhibition empirically determined from the calculated time course **(d)** via a fit to a sum of two exponentials. **f**, Closed-state antagonism model. **g**, Time course of 1PBC inhibition calculated using the closed-state antagonism model shown in **(f)** at the indicated  $\text{Ca}^{2+}$  concentrations. **h**, Time constants of blocking and unblocking and fractional inhibition empirically determined from the calculated time course **(g)** via a fit to a sum of two exponentials. **b**, **e**, **h**, The fast time constant of the two exponentials is plotted. **c**, **f**,  $K_d$  in  $\mu\text{M}$  and forward equilibrium constants are shown. For the calculations, the gating parameters were as in our previous study<sup>28</sup> and the values of the blocking parameters were:  $K_d$  of 1PBC = 3.6  $\mu\text{M}$  (as determined in Fig. 2a, b) and  $k_{on} = 1 \times 10^6 \text{ M}^{-1}\text{s}^{-1}$ . The same values

were used for the two models to allow a direct comparison. Grey, pore helices; pink, destabilized gate; blue spheres,  $\text{Ca}^{2+}$  ions; red, inhibitor. **c-h**, The time course of 1PBC block at different  $\text{Ca}^{2+}$  concentrations was calculated using Eqs. 4-13. A qualitative agreement between the data and the open-state block model is observed, where increasing  $\text{Ca}^{2+}$  concentrations slow unblocking and promote steady-state blockade. In contrast, a closed-state antagonism model predicts that increasing  $\text{Ca}^{2+}$  concentrations would antagonize inhibition by 1PBC, likely due to a corresponding depletion of the closed states.

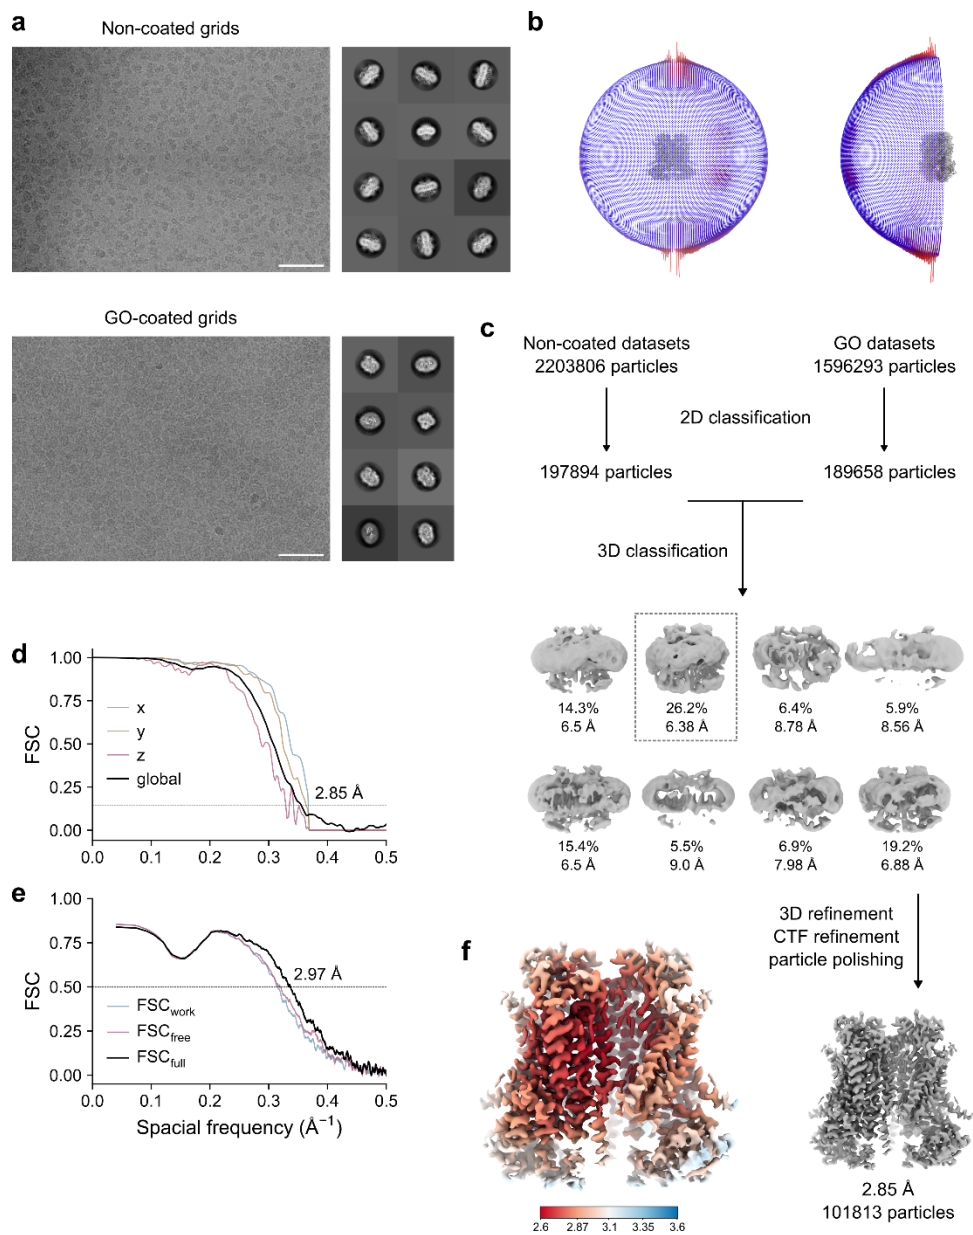

**Supplementary Fig. 3: Cryo-EM reconstruction of 1PBC/Ca<sup>2+</sup>-bound TMEM16A.** **a**, Representative micrographs (scale bar: 50 nm) and 2D class averages of TMEM16A in the presence of 1PBC and Ca<sup>2+</sup> obtained from (top) non-coated and (bottom) GO-coated Quantifoil grids. **b**, Angular distribution of particle projections used in the final refinement. **c**, Data processing workflow. **d**, Global and directional Fourier shell correlations (FSCs) between the half-maps estimated using the 3DFSC server (<https://3dfsc.salk.edu/>)<sup>64</sup>. **e**, Model-versus-map FSCs. The curves correspond to the FSC between the final model and the summed half-maps (FSC<sub>full</sub>), half-map 1 and the shaken final model refined against half-map 1 (FSC<sub>work</sub>), and half-map 2 and the shaken refined model (FSC<sub>free</sub>). **f**, Local resolution of the final map estimated using RELION.

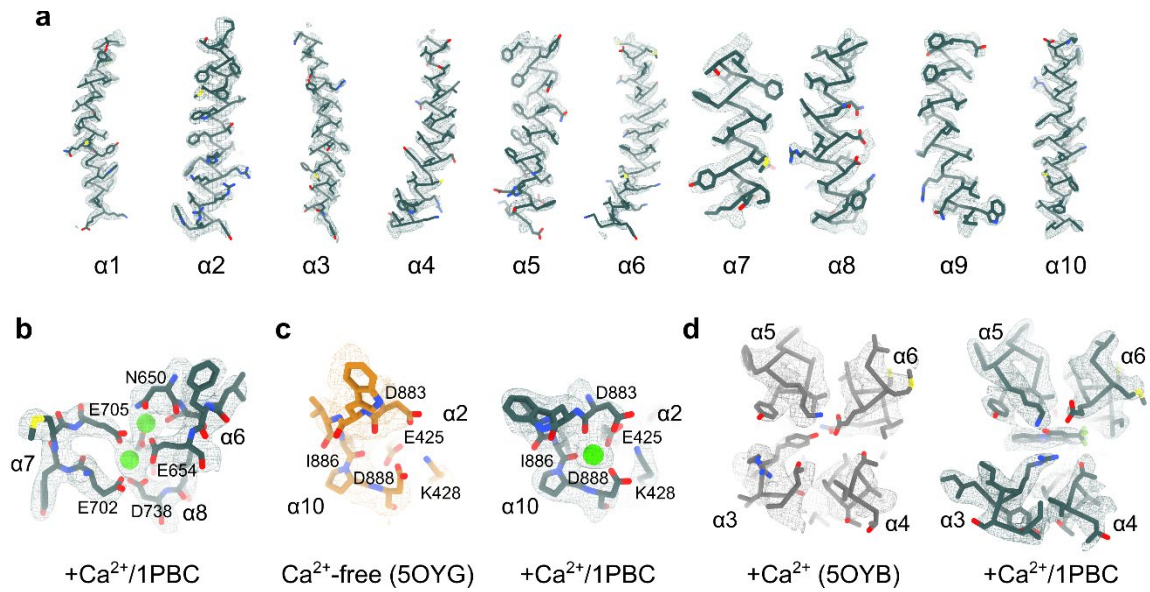

**Supplementary Fig. 4: Cryo-EM densities.** **a**, Sections of cryo-EM densities of the transmembrane region superimposed on the refined model. **b-d**, Sections of cryo-EM densities at **(b)** the canonical Ca<sup>2+</sup> binding site, **(c)** the additional third Ca<sup>2+</sup> binding site near the dimer interface, and **(d)** the 1PBC binding site superimposed on the indicated structures. The Ca<sup>2+</sup>-bound WT structure (5OYB) shows the rebuilt model with a ‘down’ conformation of  $\alpha 3$ .

**a** TMEM16A/Ca<sup>2+</sup>/1PBC  
α3 'up'

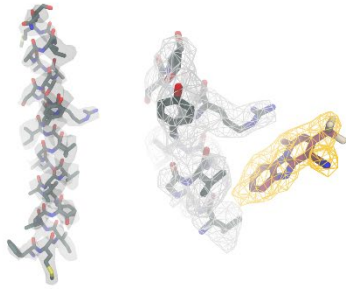

**b** TMEM16A-I551A/no Ca<sup>2+</sup> (7B5D)  
α3 'down'

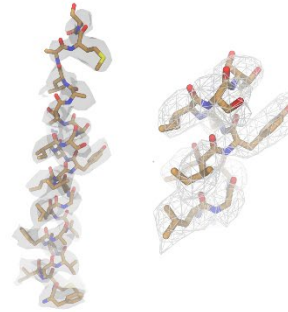

**c** TMEM16A/no Ca<sup>2+</sup> (5OYG)  
α3 'up'/'down'

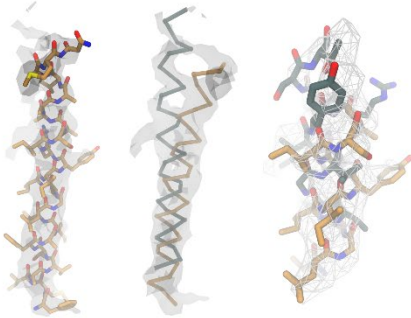

**d** TMEM16A/Ca<sup>2+</sup> (5OYB)  
α3 'up'/'down'

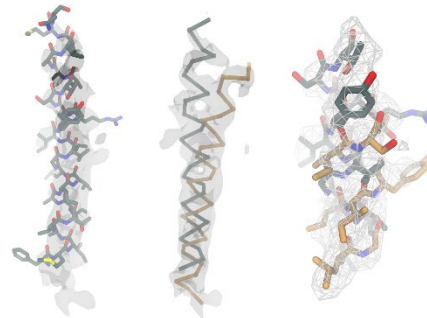

**Supplementary Fig. 5: α3 conformations.** **a-d**, Sections of cryo-EM densities of the helix α3 superimposed on the indicated structures. The 'up' conformation is shown in green and the 'down' arrangement in gold. **c, d**, α3 of the Ca<sup>2+</sup>-free and Ca<sup>2+</sup>-bound states was remodeled in light of the well-defined conformations of this helix in the here obtained 1PBC/Ca<sup>2+</sup>-bound structure and that of the constitutively active mutant I551A in the absence of Ca<sup>2+</sup>. **b-d**, The PDB ID's of the original entries are indicated.

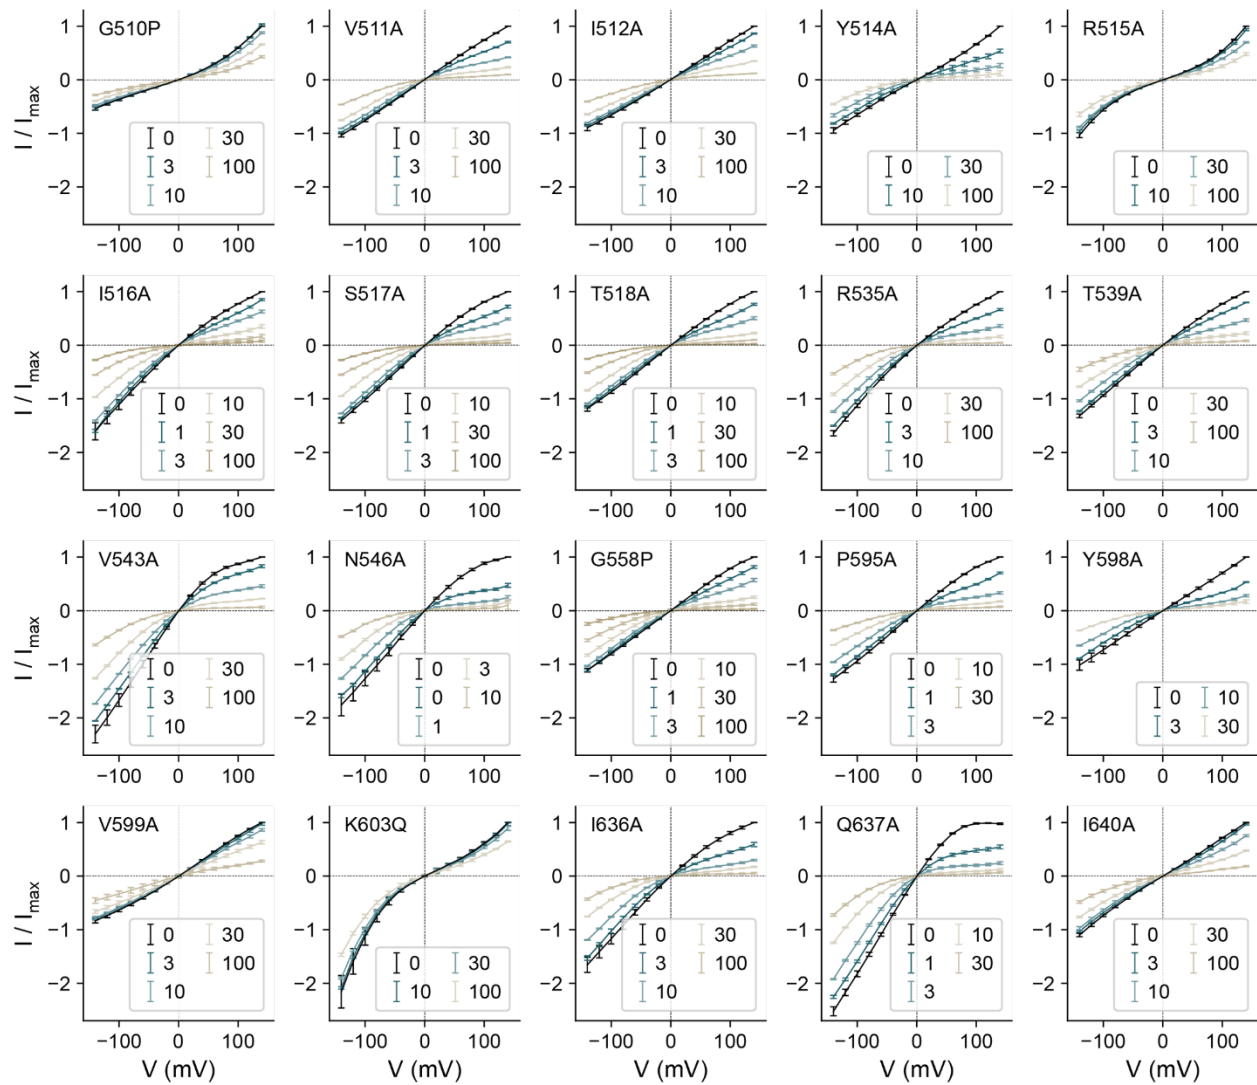

**Supplementary Fig. 6: Current-voltage relations of mutants.** Steady-state current-voltage relations of mutants at the indicated concentrations of 1PBC (in  $\mu\text{M}$ ) applied to the intracellular side of the membrane in the presence of a saturating  $\text{Ca}^{2+}$  concentration as indicated in Supplementary Table 1. Data are averages of the indicated number of biological replicates shown in Supplementary Table 1, errors are SEM.



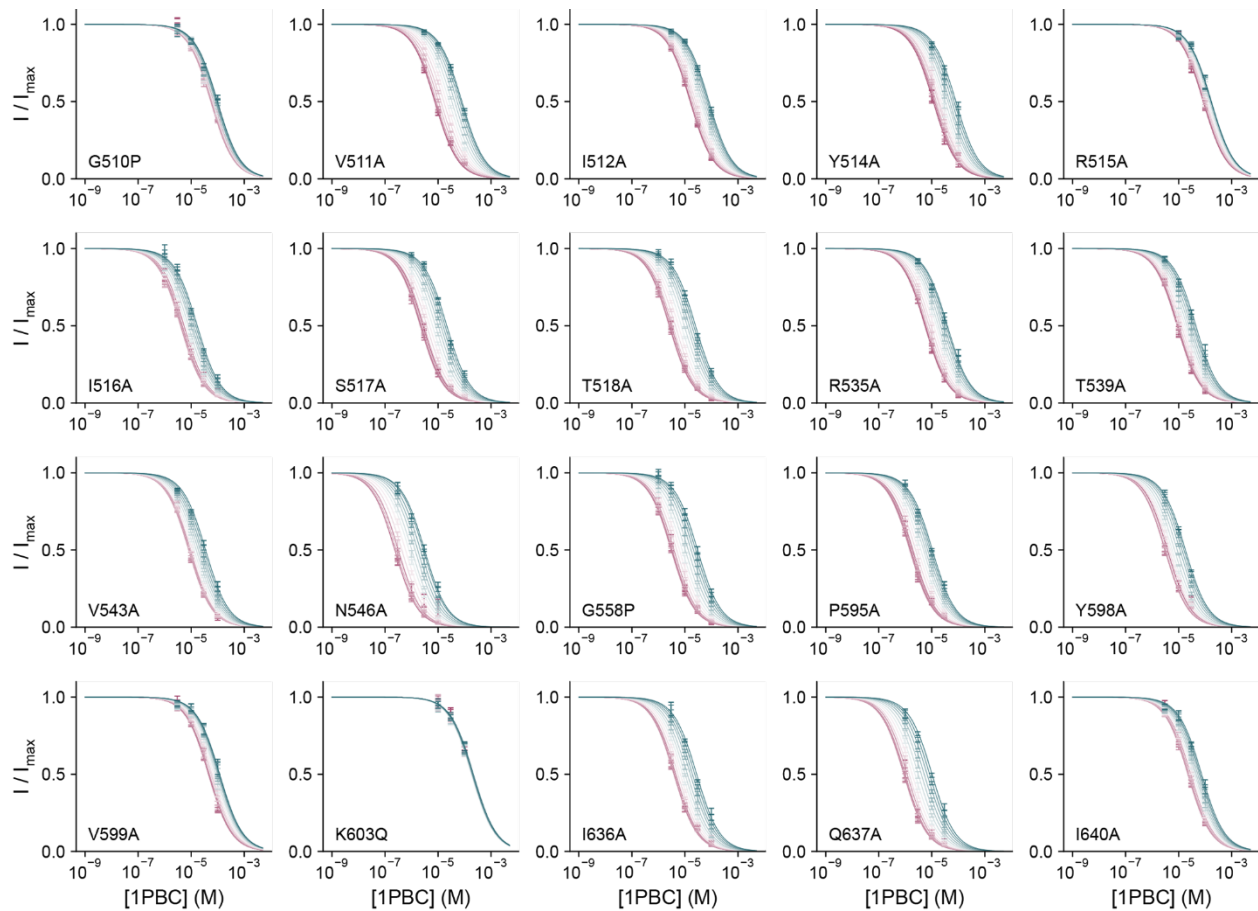

**Supplementary Fig. 7: Concentration-response relations of mutants.** 1PBC concentration-response relations of mutants in the presence of a saturating  $\text{Ca}^{2+}$  concentration at voltages from -140 (green) and 140 mV (red),  $\Delta V = 20$  mV. Data are averages of the indicated number of biological replicates shown in Supplementary Table 1, errors are SEM. Solid lines are fits to the Hill equation.

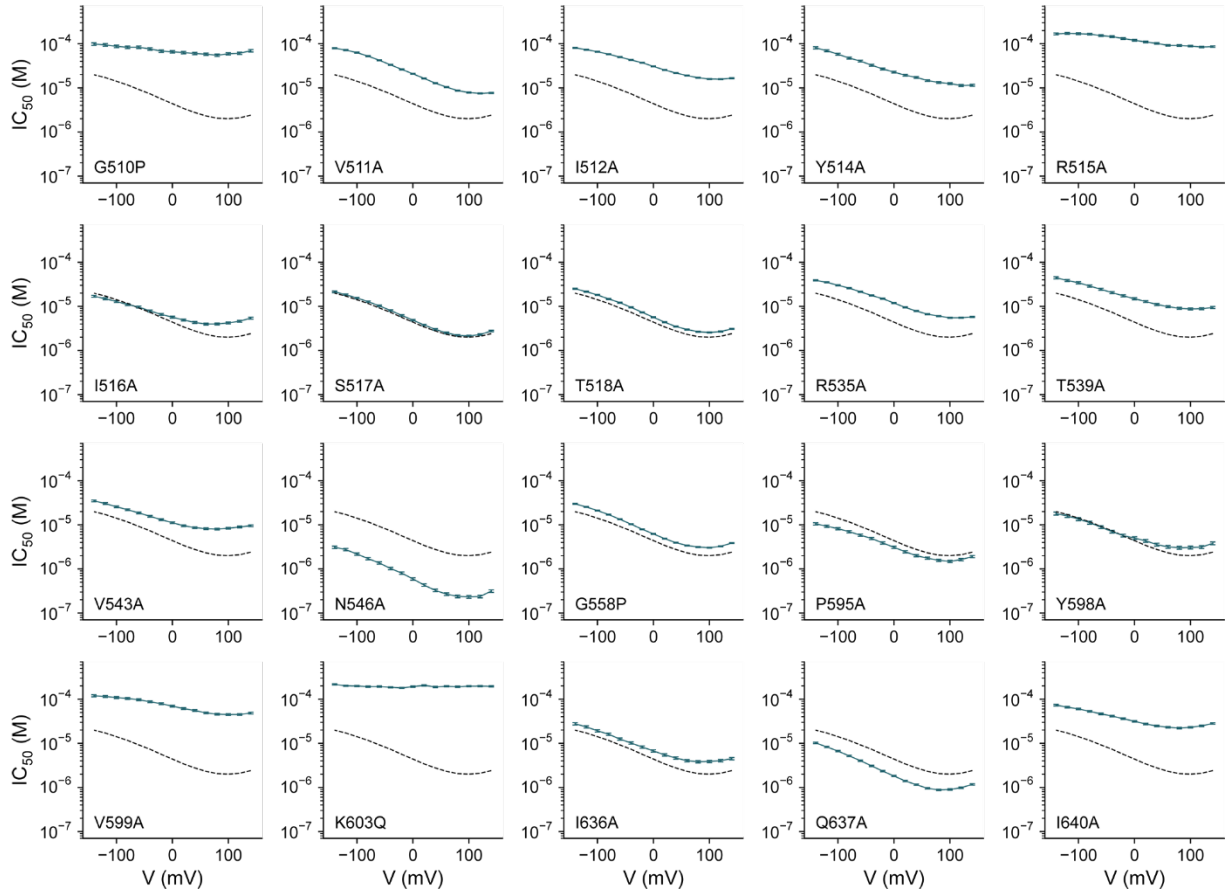

**Supplementary Fig. 8: Voltage dependence of 1PBC block of mutants.**  $IC_{50}$  values of mutants obtained in Supplementary Fig. 7 at the indicated voltages. Data are best-fit values of the indicated number of biological replicates shown in Supplementary Table 1, errors are 95% CI. Dashed lines are the relation of WT.

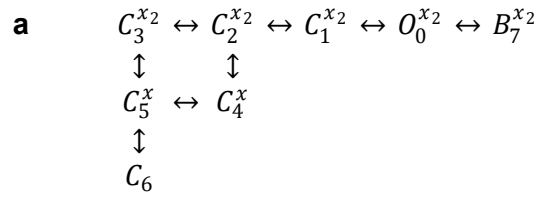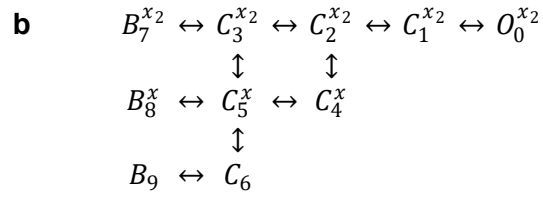

**Supplementary Fig. 9: Mechanistic schemes.** **a**, Open-state block. The scheme depicts a previously described gating mechanism<sup>28</sup> with addition of a blocker binding step to the open state. **b**, Closed-state antagonism where blocker binding steps were added to the states C<sub>3</sub>, C<sub>5</sub>, and C<sub>6</sub>. **a**, **b**, C, O, and B correspond to the closed, open, and blocked/inhibited states respectively, and the subscripts denote the number assigned to the states.

## Supplementary Tables

**Supplementary Table 1: IC<sub>50</sub> of 1PBC of mutants.**

|       | [Ca <sup>2+</sup> ] | n | 140   | 120   | 100   | 80    | 60    | 40    | 20    | 0     | -20   | -40   | -60   | -80   | -100  | -120  | -140  |
|-------|---------------------|---|-------|-------|-------|-------|-------|-------|-------|-------|-------|-------|-------|-------|-------|-------|-------|
| WT    | 2                   | 6 | 2.41  | 2.1   | 2.0   | 2.06  | 2.32  | 2.77  | 3.42  | 4.4   | 5.63  | 7.34  | 9.2   | 11.6  | 14.1  | 17.2  | 19.9  |
| G510P | 15                  | 9 | 69.5  | 60.9  | 59.3  | 54.9  | 58.2  | 60.2  | 63.2  | 65.7  | 68.2  | 76.6  | 83.4  | 83.4  | 87.4  | 94.4  | 98.6  |
| V511A | 2                   | 7 | 7.71  | 7.49  | 7.86  | 8.67  | 10.4  | 12.8  | 16.4  | 20.8  | 26.3  | 33.3  | 42.3  | 52.4  | 62.9  | 72.1  | 79.5  |
| I512A | 2                   | 5 | 16.6  | 15.8  | 15.9  | 17.0  | 19.0  | 21.8  | 25.5  | 30.7  | 37.1  | 42.9  | 50.1  | 57.9  | 66.1  | 73.6  | 80.9  |
| Y514A | 2                   | 5 | 11.5  | 11.3  | 12.5  | 13.3  | 14.6  | 17.3  | 19.4  | 22.8  | 26.9  | 32.7  | 40.6  | 47.4  | 58.0  | 69.6  | 81.0  |
| R515A | 4                   | 8 | 86.1  | 84.4  | 88.7  | 91.4  | 92.1  | 102.0 | 110.0 | 120.0 | 131.0 | 145.0 | 153.0 | 166.0 | 169.0 | 172.0 | 168.0 |
| I516A | 2                   | 5 | 5.41  | 4.6   | 4.22  | 4.0   | 3.97  | 4.32  | 4.91  | 5.69  | 6.57  | 7.87  | 9.65  | 11.0  | 12.9  | 15.0  | 17.0  |
| S517A | 2                   | 5 | 2.76  | 2.29  | 2.14  | 2.2   | 2.51  | 3.01  | 3.78  | 4.87  | 6.24  | 8.08  | 10.3  | 12.8  | 15.5  | 18.4  | 21.4  |
| T518A | 2                   | 6 | 3.08  | 2.69  | 2.55  | 2.66  | 2.99  | 3.5   | 4.37  | 5.67  | 7.32  | 9.5   | 12.2  | 14.7  | 18.1  | 21.5  | 25.1  |
| R535A | 2                   | 7 | 5.76  | 5.53  | 5.51  | 6.02  | 6.65  | 7.82  | 9.48  | 11.9  | 14.9  | 17.7  | 21.4  | 25.9  | 30.1  | 35.1  | 38.8  |
| T539A | 2                   | 5 | 9.45  | 8.83  | 8.74  | 9.02  | 9.86  | 11.0  | 12.9  | 14.9  | 17.3  | 20.5  | 24.4  | 28.9  | 34.3  | 38.6  | 44.4  |
| V543A | 15                  | 7 | 9.55  | 8.93  | 8.37  | 8.02  | 8.16  | 8.65  | 9.55  | 11.2  | 13.1  | 15.6  | 18.6  | 22.0  | 25.7  | 30.4  | 34.9  |
| N546A | 2                   | 6 | 0.315 | 0.238 | 0.233 | 0.239 | 0.269 | 0.326 | 0.431 | 0.594 | 0.805 | 1.02  | 1.36  | 1.72  | 2.17  | 2.75  | 3.1   |
| G558P | 15                  | 8 | 3.86  | 3.26  | 3.03  | 3.14  | 3.4   | 3.94  | 4.87  | 6.23  | 7.94  | 10.4  | 13.4  | 17.1  | 21.1  | 25.4  | 30.0  |
| P595A | 2                   | 5 | 1.91  | 1.63  | 1.48  | 1.57  | 1.75  | 2.0   | 2.46  | 3.1   | 3.88  | 4.91  | 5.83  | 7.0   | 8.19  | 9.33  | 10.5  |
| Y598A | 2                   | 5 | 3.81  | 3.13  | 3.06  | 3.04  | 3.16  | 3.57  | 4.35  | 5.0   | 5.71  | 7.02  | 8.86  | 11.2  | 13.5  | 15.9  | 18.0  |
| V599A | 15                  | 7 | 48.5  | 45.1  | 45.0  | 45.8  | 48.9  | 55.5  | 61.3  | 69.5  | 79.2  | 87.5  | 97.2  | 104.0 | 109.0 | 115.0 | 119.0 |
| K603Q | 4                   | 8 | 196.0 | 198.0 | 197.0 | 192.0 | 196.0 | 190.0 | 206.0 | 193.0 | 180.0 | 187.0 | 193.0 | 193.0 | 199.0 | 202.0 | 216.0 |
| I636A | 15                  | 4 | 4.5   | 4.05  | 3.89  | 3.83  | 4.03  | 4.65  | 5.47  | 6.73  | 8.22  | 10.2  | 12.5  | 16.0  | 19.2  | 23.6  | 27.8  |
| Q637A | 2                   | 7 | 1.17  | 0.985 | 0.898 | 0.88  | 0.956 | 1.15  | 1.4   | 1.82  | 2.34  | 3.08  | 4.04  | 5.19  | 6.66  | 8.29  | 10.2  |
| I640A | 15                  | 5 | 28.2  | 24.9  | 23.1  | 22.1  | 23.1  | 24.7  | 27.5  | 31.5  | 36.1  | 41.5  | 46.6  | 53.0  | 60.2  | 66.0  | 73.5  |

IC<sub>50</sub> in  $\mu\text{M}$ ; [Ca<sup>2+</sup>], intracellular Ca<sup>2+</sup> concentration in  $\mu\text{M}$ ; n, number of biological replicates; header, applied voltage in mV.

**Supplementary Table 2: 95% CI of IC<sub>50</sub> of mutants.**

|       | [Ca <sup>2+</sup> ] | n | 140   | 120   | 100   | 80    | 60    | 40    | 20    | 0     | -20   | -40   | -60   | -80  | -100 | -120 | -140 |
|-------|---------------------|---|-------|-------|-------|-------|-------|-------|-------|-------|-------|-------|-------|------|------|------|------|
| WT    | 2                   | 6 | 0.071 | 0.062 | 0.059 | 0.061 | 0.068 | 0.081 | 0.1   | 0.13  | 0.16  | 0.21  | 0.27  | 0.34 | 0.42 | 0.51 | 0.59 |
| G510P | 15                  | 9 | 4.4   | 3.8   | 3.6   | 3.4   | 3.6   | 3.7   | 3.9   | 4.1   | 4.3   | 4.9   | 5.4   | 5.4  | 5.7  | 6.3  | 6.6  |
| V511A | 2                   | 7 | 0.2   | 0.2   | 0.2   | 0.23  | 0.27  | 0.33  | 0.42  | 0.54  | 0.69  | 0.88  | 1.1   | 1.4  | 1.8  | 2.1  | 2.3  |
| I512A | 2                   | 5 | 0.38  | 0.36  | 0.36  | 0.39  | 0.44  | 0.5   | 0.59  | 0.72  | 0.88  | 1.0   | 1.2   | 1.4  | 1.7  | 1.9  | 2.1  |
| Y514A | 2                   | 5 | 0.54  | 0.54  | 0.59  | 0.62  | 0.68  | 0.8   | 0.89  | 1.1   | 1.2   | 1.5   | 1.9   | 2.3  | 2.9  | 3.6  | 4.3  |
| R515A | 4                   | 8 | 3.3   | 3.2   | 3.4   | 3.5   | 3.6   | 4.0   | 4.4   | 5.0   | 5.6   | 6.4   | 6.8   | 7.6  | 7.8  | 8.0  | 7.7  |
| I516A | 2                   | 5 | 0.27  | 0.23  | 0.21  | 0.2   | 0.2   | 0.21  | 0.24  | 0.28  | 0.33  | 0.39  | 0.48  | 0.54 | 0.64 | 0.75 | 0.85 |
| S517A | 2                   | 5 | 0.1   | 0.088 | 0.082 | 0.084 | 0.095 | 0.11  | 0.14  | 0.18  | 0.24  | 0.31  | 0.39  | 0.48 | 0.59 | 0.7  | 0.82 |
| T518A | 2                   | 6 | 0.085 | 0.075 | 0.071 | 0.074 | 0.083 | 0.097 | 0.12  | 0.16  | 0.2   | 0.26  | 0.34  | 0.41 | 0.51 | 0.61 | 0.71 |
| R535A | 2                   | 7 | 0.17  | 0.16  | 0.16  | 0.17  | 0.19  | 0.22  | 0.27  | 0.34  | 0.42  | 0.5   | 0.61  | 0.74 | 0.87 | 1.0  | 1.2  |
| T539A | 2                   | 5 | 0.49  | 0.46  | 0.46  | 0.47  | 0.52  | 0.57  | 0.67  | 0.78  | 0.91  | 1.1   | 1.3   | 1.5  | 1.9  | 2.1  | 2.5  |
| V543A | 15                  | 7 | 0.41  | 0.39  | 0.36  | 0.35  | 0.35  | 0.37  | 0.41  | 0.48  | 0.56  | 0.67  | 0.81  | 0.96 | 1.1  | 1.4  | 1.6  |
| N546A | 2                   | 6 | 0.021 | 0.016 | 0.016 | 0.017 | 0.018 | 0.021 | 0.027 | 0.036 | 0.048 | 0.062 | 0.082 | 0.1  | 0.13 | 0.17 | 0.19 |
| G558P | 15                  | 8 | 0.088 | 0.074 | 0.069 | 0.072 | 0.077 | 0.09  | 0.11  | 0.14  | 0.18  | 0.24  | 0.3   | 0.39 | 0.48 | 0.59 | 0.7  |
| P595A | 2                   | 5 | 0.11  | 0.093 | 0.085 | 0.09  | 0.099 | 0.11  | 0.14  | 0.17  | 0.22  | 0.28  | 0.33  | 0.4  | 0.47 | 0.54 | 0.61 |
| Y598A | 2                   | 5 | 0.28  | 0.23  | 0.23  | 0.23  | 0.23  | 0.26  | 0.31  | 0.36  | 0.41  | 0.5   | 0.64  | 0.83 | 1.0  | 1.2  | 1.4  |
| V599A | 15                  | 7 | 2.1   | 2.0   | 2.0   | 2.0   | 2.2   | 2.5   | 2.8   | 3.2   | 3.7   | 4.2   | 4.8   | 5.2  | 5.5  | 5.9  | 6.2  |
| K603Q | 4                   | 8 | 6.2   | 6.3   | 6.3   | 6.1   | 6.2   | 6.0   | 6.7   | 6.1   | 5.5   | 5.8   | 6.1   | 6.1  | 6.4  | 6.5  | 7.2  |
| I636A | 15                  | 4 | 0.27  | 0.24  | 0.23  | 0.23  | 0.24  | 0.27  | 0.32  | 0.39  | 0.47  | 0.59  | 0.72  | 0.94 | 1.1  | 1.4  | 1.7  |
| Q637A | 2                   | 7 | 0.042 | 0.036 | 0.034 | 0.033 | 0.035 | 0.041 | 0.049 | 0.063 | 0.08  | 0.11  | 0.14  | 0.18 | 0.24 | 0.3  | 0.37 |
| I640A | 15                  | 5 | 1.1   | 0.97  | 0.89  | 0.86  | 0.9   | 0.96  | 1.1   | 1.2   | 1.4   | 1.7   | 1.9   | 2.2  | 2.5  | 2.8  | 3.2  |

CI, confidence interval in  $\mu\text{M}$ ; [Ca<sup>2+</sup>], intracellular Ca<sup>2+</sup> concentration in  $\mu\text{M}$ ; n, number of biological replicates; header, applied voltage in mV.

**Supplementary Table 3: List of primers.**

| Name  | F/R | Sequence (5'-to-3')                                 |
|-------|-----|-----------------------------------------------------|
| G510A | F   | GTC CTC GCC GTT ATC ATC TAT AGA ATC TCC ACA GCT GCA |
| G510A | R   | GAT AAC GGC GAG GAC GAT TGC AAA TGT CAC TGC GAT CAT |
| G510P | F   | GTC CTC CCC GTT ATC ATC TAT AGA ATC TCC ACA GCT GCA |
| G510P | R   | GAT AAC GGG GAG GAC GAT TGC AAA TGT CAC TGC GAT CAT |
| V511A | F   | CTC GGA GCC ATC ATC TAT AGA ATC TCC ACA GCT GCA GCC |
| V511A | R   | GAT GAT GGC TCC GAG GAC GAT TGC AAA TGT CAC TGC GAT |
| I512A | F   | GGA GTT GCC ATC TAT AGA ATC TCC ACA GCT GCA GCC TTG |
| I512A | R   | ATA GAT GGC AAC TCC GAG GAC GAT TGC AAA TGT CAC TGC |
| Y514A | F   | ATC ATC GCA AGA ATC TCC ACA GCT GCA GCC TTG GCC ATG |
| Y514A | R   | GAT TCT TGC GAT GAT AAC TCC GAG GAC GAT TGC AAA TGT |
| R515A | F   | ATC TAT GCC ATC TCC ACA GCT GCA GCC TTG GCC ATG AAC |
| R515A | R   | GGA GAT GGC ATA GAT GAT AAC TCC GAG GAC GAT TGC AAA |
| I516A | F   | TAT AGA GCC TCC ACA GCT GCA GCC TTG GCC ATG AAC TCC |
| I516A | R   | TGT GGA GGC TCT ATA GAT GAT AAC TCC GAG GAC GAT TGC |
| S517A | F   | AGA ATC GCC ACA GCT GCA GCC TTG GCC ATG AAC TCC TCC |
| S517A | R   | AGC TGT GGC GAT TCT ATA GAT GAT AAC TCC GAG GAC GAT |
| T518A | F   | ATC TCC GCC GCT GCA GCC TTG GCC ATG AAC TCC TCC CCG |
| T518A | R   | TGC AGC GGC GGA GAT TCT ATA GAT GAT AAC TCC GAG GAC |
| R535A | F   | AAC ATC GCA GTT ACA GTC ACG GCC ACC GCT GTT ATC ATC |
| R535A | R   | TGT AAC TGC GAT GTT GGA CCG CAC AGA CGG GGA GGA GTT |
| T539A | F   | ACA GTC GCC GCC ACC GCT GTT ATC ATC AAC CTC GTG GTC |
| T539A | R   | GGT GGC GGC GAC TGT AAC CCG GAT GTT GGA CCG CAC AGA |
| V543A | F   | ACC GCT GCC ATC ATC AAC CTC GTG GTC ATC ATT CTG CTG |
| V543A | R   | GAT GAT GGC AGC GGT GGC CGT GAC TGT AAC CCG GAT GTT |
| N546A | F   | ATC ATC GCA CTC GTG GTC ATC ATT CTG CTG GAT GAA GTT |
| N546A | R   | CAC GAG TGC GAT GAT AAC AGC GGT GGC CGT GAC TGT AAC |
| I551A | F   | GTC ATC GCC CTG CTG GAT GAA GTT TAC GGC TGC ATT GCC |
| I551A | R   | CAG CAG GGC GAT GAC CAC GAG GTT GAT GAT AAC AGC GGT |
| G558A | F   | GTT TAC GCC TGC ATT GCC AGG TGG CTC ACC AAG ATT GAG |
| G558A | R   | AAT GCA GGC GTA AAC TTC ATC CAG CAG AAT GAT GAC CAC |
| G558P | F   | GTT TAC CCC TGC ATT GCC AGG TGG CTC ACC AAG ATT GAG |
| G558P | R   | AAT GCA GGC GTA AAC TTC ATC CAG CAG AAT GAT GAC CAC |
| P595A | F   | TAC ACT GCC ATC TTC TAT GTC GCC TTC TTC AAA GGC CGG |
| P595A | R   | GAA GAT GGC AGT GTA AGA GTT CAC AAA CTT GAG CAG GAA |
| Y598A | F   | ATC TTC GCC GTC GCC TTC TTC AAA GGC CGG TTT GTT GGT |
| Y598A | R   | GGC GAC GGC GAA GAT GGG AGT GTA AGA GTT CAC AAA CTT |
| V599A | F   | TTC TAT GCC GCC TTC TTC AAA GGC CGG TTT GTT GGT CGG |

|       |   |                                                     |
|-------|---|-----------------------------------------------------|
| V599A | R | GAA GGC GGC ATA GAA GAT GGG AGT GTA AGA GTT CAC AAA |
| K603Q | F | TTC TTC CAG GGC CGG TTT GTT GGT CGG CCC GGT GAC TAC |
| K603Q | R | CCG GCC CTG GAA GAA GGC GAC ATA GAA GAT GGG AGT GTA |
| I636A | F | CTC TGT GCC CAG CTG AGC ATC ATT ATG CTG GGC AAG CAG |
| I636A | R | CAG CTG GGC ACA GAG CTC CAT GAG GCA GCC GCC CGG GGC |
| Q637A | F | TGT ATC GCC CTG AGC ATC ATT ATG CTG GGC AAG CAG CTA |
| Q637A | R | GCT CAG GGC GAT ACA GAG CTC CAT GAG GCA GCC GCC CGG |
| I640A | F | CTG AGC GCC ATT ATG CTG GGC AAG CAG CTA ATC CAG AAC |
| I640A | R | CAT AAT GGC GCT CAG CTG GAT ACA GAG CTC CAT GAG GCA |
| Q649A | F | CTA ATC GCA AAC AAT CTC TTC GAG ATT GGC ATC CCG AAG |
| Q649A | R | ATT GTT TGC GAT TAG CTG CTT GCC CAG CAT AAT GAT GCT |

F, forward; R, reverse
